# Supplementary material
Source: PubMed Central journal article supplement (PMC5994925)

## High-resolution MRI

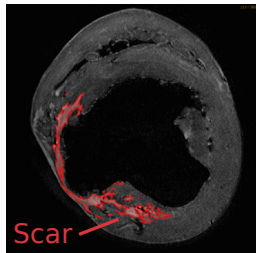

**Voxel size:**  $0.25 \times 0.25 \times 0.5 \text{ mm}^3$   
n = 8 porcine hearts

## 3D Model construction

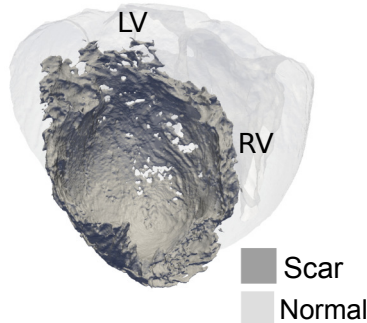

## Surviving tissue thickness calculation

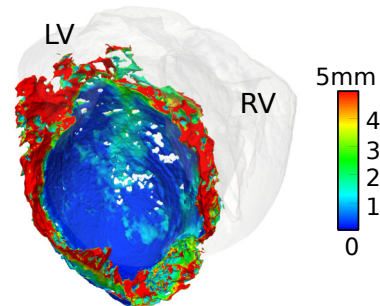

## VT Simulation

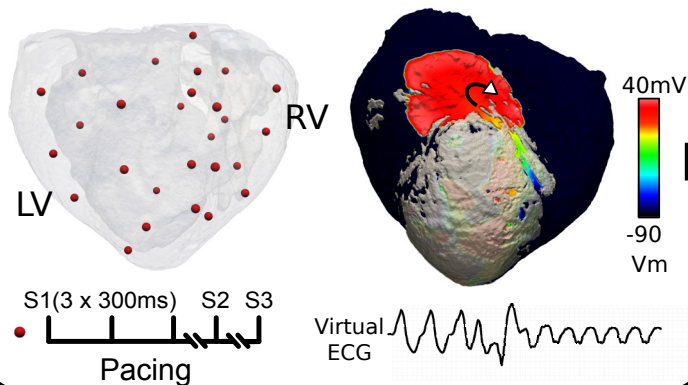

## Correlating VT/structure

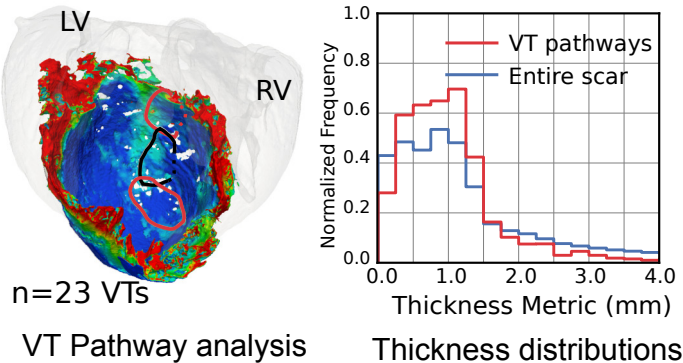

Supplement: NIHMS965325-supplement-006131_graphic_abstract.pdf [file NIHMS965325-supplement-006131_graphic_abstract.pdf]
